# Supplementary material for: Hypergraph-based Multi-instance Contrastive Reinforcement Learning for Annotation-free Pan-cancer Survival Prediction on Whole Slide Histology Images
Source: Research Square preprint supplement (doi:10.21203/rs.3.rs-4918308/v1), 2024-10-17
Supplement: Supplementary file 1 [file 7ec02a866b20830b76fa7cc4.pdf]

Corresponding author(s): DBPRLast updated by author(s): September 25, 2024

# Machine Learning Reporting Summary

## 1. Availability and reproducibility of Code and Data

Please select all that apply regarding the availability of the data and code used in the study.

- ☒ Code will be included in a CodeOcean capsule.
- ☒ The source code is included in the submission or available in a public repository: <https://github.com/pikapi-pi/HeMiCoRe> (url)
- ☐ A compiled standalone version of the software is included in the submission or available in a public repository: \_\_\_\_\_ (url)
- ☒ A test dataset and instructions/scripts for replicating the results are included in the submission or available in a public repository: <https://github.com/pikapi-pi/HeMiCoRe> (url)
- ☒ A Readme file with instructions for installing and running the code is included in the submission or available in a public repository: <https://github.com/pikapi-pi/HeMiCoRe> (url)
- ☒ The code is made available to reviewers during review.
- ☒ Pretrained models are used in the study and accessible through: <https://download.pytorch.org/models/resnet18-5c1061d0.pth> (url)
- ☐ Pretrained models are used in the study and are not accessible.
- ☒ The paper contains information on how to obtain code and data after publication.

## 2. Datasets

- A. All data sources are listed in the paper.
  - ☐ Yes
  - ☒ No (please justify) We have used the TCGA data and some private cohorts for the model training and validation. Since we opted for the double-blind peer review (DBPR), the sources of
- B. The train, test and validation datasets are publicly available and links/accession numbers have been provided in the manuscript or supplementary materials.
  - ☒ Yes
  - ☐ No (please justify) \_\_\_\_\_
- C. We have reported and discussed potential dataset biases in the paper. Where applicable, appropriate mitigation strategies were used.
  - ☒ Yes (please specify section) Please see them in the section Results
  - ☐ No (please justify) \_\_\_\_\_

- D. The data cleaning and preprocessing steps are clearly and fully described, either in text or as a code pipeline.  
☒ Yes (please specify section) Please see it in the readme.md at <https://github.com/pikapi-pi/HeMiCoRe>  
☐ No (please justify) \_\_\_\_\_
- E. Instances of combining data from multiple sources are clearly identified, and potential issues mitigated.  
☒ Yes (please specify section) We have conducted some cross-site validation experiments to investigate the effect of different data sources. Please see them in the section Results.  
☐ No (please justify) \_\_\_\_\_

### 3. Model and training

- A. What model architecture is the current model based on? Hypergraph Neural Network
- B. A Model Card is provided<sup>1</sup>.  
☒ Yes  
☐ No
- C. The model clearly splits data into different sets for training (model selection), validation (hyperparameter optimization), and testing (final evaluation).  
☒ Yes  
☐ No
- D. The method of data splitting (e.g. random, cluster- or time-based splitting, forward cross-validation) is clearly stated.  
☒ Yes (please specify) We used five-fold stratified cross-validation  
☐ No (please justify) \_\_\_\_\_
- E. The data splitting mimics anticipated real-world applications.  
☐ Yes  
☒ No
- F. The data splitting procedure has been chosen to avoid data leakage.  
☒ Yes (please specify) The data splitting procedure has been chosen to avoid data leakage and keep the balance of samples.  
☐ No (please justify) \_\_\_\_\_
- G. The interpretability of the model has been studied and clearly validated.  
☒ Yes (please specify section) Please see it in the section Results.  
☐ No (please justify) \_\_\_\_\_

### 4. Evaluation

- A. The performance metrics used are described and justified in the paper.  
☒ Yes (please specify section) Please see it in the section Results and Supplementary.  
☐ No (please justify) \_\_\_\_\_

<sup>1</sup> <https://huggingface.co/docs/hub/model-cards>

- B. Cross-validation of the results is included.
  - ☒ Yes
  - ☐ No
- C. Community-accepted benchmark datasets/tasks are used for comparisons.
  - ☒ Yes (please specify) The majority of our datasets are from the community-accepted public data source TCGA. The benchmark task is survival prediction.
  - ☐ No
- D. Baseline comparisons to simple/trivial models (for example, 1-nearest neighbour, random forest, most frequent class) are provided.
  - ☐ Yes
  - ☒ No
- E. Benchmarks with current state-of-the-art are provided.
  - ☒ Yes
  - ☐ No
- F. Ablation experiments are included.
  - ☐ Yes
  - ☒ No
- G. The model has been tested on a fully independent dataset.
  - ☒ Yes
  - ☐ No

## 5. Computational resources

- A. The paper contains information on hardware/computing resources that were used.
  - ☒ Yes
  - ☐ No
- B. The paper includes information on the computational costs in terms of computation time, parallelization or carbon footprints estimates.
  - ☒ Yes
  - ☐ No
